1 **Cycling for climate and public health: a missed opportunity for France**

2

3 *Emilie Schwarz<sup>1</sup>, Marion Leroutier<sup>2</sup>, Philippe Quirion<sup>3</sup>, Kévin Jean<sup>1,4\*</sup>*

4

5 <sup>1</sup>Laboratoire MESuRS, Conservatoire national des Arts et Métiers, Paris, France

6 <sup>2</sup>Mistra centre for sustainable markets (Misum), Stockholm School of Economics, Stockholm, Sweden

7 <sup>3</sup>Centre international de recherche sur l'environnement et le développement (CIRED), Centre  
8 national de la recherche scientifique, (CNRS), Nogent-sur-Marne, France ;

9 <sup>4</sup>MRC Centre for Global Infectious Disease Analysis, Department of Infectious Disease Epidemiology,  
10 Imperial College London, United Kingdom

11

12 \*Correspondance to :

13 Kévin Jean

14 Laboratoire MESuRS, Conservatoire National des Arts et Métiers, 292 rue Saint Martin, 75003, Paris,  
15 France ; [kevin.jean@lecnam.net](mailto:kevin.jean@lecnam.net)

16

17

18

19 Conflict of interest

20 The authors declare no conflict of interest.

21

22 Keywords: health impact assessment; cycling; physical activity; active transportation; health  
23 cobenefits of climate action; climate change mitigation.

24

## 25 **ABSTRACT**

26 In addition to its potential contribution to reaching climate targets, cycling may generate substantial  
27 population-level health benefits through the physical activity it requires. Due to the lack of nationally  
28 representative mobility data, the health impact of current levels of cycling is still unknown for France.  
29 Relying on a health impact assessment framework and using recent nationally-representative data on  
30 mobility, we assessed the health and related economic benefits of cycling in 2018-2019 in France. We  
31 show that such benefits remain moderated and fall short when compared to those estimated in  
32 other countries with high cycling levels. We argue that cycling in France did not receive the attention  
33 and investments it deserves over the past decade and thus represents a missed opportunity for  
34 climate action and public health.

35

36

## 37 **Introduction**

38 A recent report released by the French Agency for Food, Environmental and Occupational Health &  
39 Safety estimates that 95% of the French adult population faces a risk of deteriorating health due to  
40 lack of physical activity [1]. The agency highlights the importance, among others, of collective  
41 mobility choices in contributing to this situation. Among these, cycling may represent a particularly  
42 relevant active transportation option in France, as an estimated 60% of commuting trips shorter than  
43 5 km are still made by car [2]. Moreover, the transportation sector is responsible for 31% of the  
44 national greenhouse gas emissions in France, representing the highest emitting sector [3]. With more  
45 than half of these emissions attributable to individual motorized vehicles, encouraging a shift to low-  
46 carbon modes such as cycling is an important lever to meet national emission reduction targets.

47 In countries with high cycling levels, it has been assessed that physical activity through cycling  
48 generates substantial population-level health benefits [4]. Due to the scarcity of country-level  
49 representative mobility data, the contribution of current levels of cycling is still unknown for France.  
50 Until recently, the latest nationally-representative mobility survey was conducted in 2008. In early  
51 2022, the data was released from the most recent round of this mobility survey, the *Enquête mobilité*  
52 *des personnes* (*People's mobility survey*) conducted in 2018-2019 [5]. We used this updated data to  
53 assess the health and related economic benefits of cycling in 2018-2019 in metropolitan France.

54

## 55 **Methods**

56 Demographic data consisting of age-specific population sizes and mortality rates were retrieved from  
57 the National Institute of Statistics and Economic Studies (INSEE), using the central projection scenario  
58 with low fertility.[6]

59 Mobility data were extracted from the 2019 *Enquête mobilité des personnes (People's mobility*  
60 *survey)*. The 2019 round collected data from 13,825 households in metropolitan France.[5] One  
61 member of each household was selected and questioned about their trips across the previous day.  
62 The sampling design and sampling weights ensure that the survey data is nationally representative Of  
63 travel behaviours for individuals aged 6 years or older, across weekdays and weekends. Distances  
64 travelled were calculated based on reported departures and arrival location, and converted into  
65 times considering an average speed of 14.9 km.h<sup>-1</sup> [7].

66 Based on the approach described by Fishman et al. (2015), we used age-specific weekly cycling  
67 minutes, population counts, and mortality rates for 2019, and assumed a linear dose-response  
68 function of 10% reduction in all-cause mortality for 100 minutes of cycling per week [8]. Given that  
69 the meta-analysis by Kelly et al considered all-cause mortality, any increase in mortality in terms of  
70 road accidents and exposure to air pollution is already accounted for in the dose-response estimate.  
71 Risk reduction estimates were scaled at the yearly level assuming a linear dose-response function.  
72 The age range considered for a reduction of mortality attributable to physical activity increase was  
73 20-89 years. Younger and older ages were disregarded because the evidence for the health effects of  
74 physical activity in those age categories are small.

75 We estimated the yearly number of premature deaths averted by active transportation for each age.  
76 We also calculated the years of life lost (YLL) averted by active transportation, along with the annual  
77 monetary benefits of cycling based on the standard value of statistical life year (VSLY). National  
78 guidelines for the socioeconomic evaluation of public investments recommended a VSLY of €135,000  
79 in 2019 [9]. Lastly, we used age-specific death rates to estimate the increase in life expectancy due to  
80 cycling at 2019 levels.

81

## 82 **Results**

83 The average weekly minutes of cycling per person in 2019 in France was estimated at 8.7 min.w<sup>-1</sup>,  
84 peaking at 13.4 min.w<sup>-1</sup> among the 70-74-year-old group (Table 1). Overall, we estimate that 2019  
85 levels of cycling represented nearly 2,900 yearly premature deaths and 38 000 YLL prevented. This  
86 translates into a <1-month increase of life expectancy in the general population. We evaluated that  
87 the annual monetary benefits of cycling reached €5 billion in France.

88 **Table 1:** Health impact assessment of 2019 levels of cycling in metropolitan France among adults  
 89 aged 20 to 89 years.

| Age group, years        | Average weekly minutes of cycling per person <sup>1</sup> | Population, x1,000 <sup>2</sup> | Mortality rate, per 100,000 <sup>2</sup> | Mortality rate reduction <sup>3</sup> , % | Annual # of premature death prevented | Annual benefits of cycling, in € million <sup>4</sup> | Increase in life expectancy, in months |
|-------------------------|-----------------------------------------------------------|---------------------------------|------------------------------------------|-------------------------------------------|---------------------------------------|-------------------------------------------------------|----------------------------------------|
| 20-24                   | 4.9                                                       | 3811                            | 38                                       | 0.49                                      | 7                                     | 58                                                    | 0.007                                  |
| 25-29                   | 7.1                                                       | 3927                            | 42                                       | 0.71                                      | 12                                    | 87                                                    | 0.010                                  |
| 30-34                   | 10.2                                                      | 4128                            | 55                                       | 1.02                                      | 23                                    | 157                                                   | 0.017                                  |
| 35-39                   | 11.1                                                      | 4113                            | 87                                       | 1.11                                      | 40                                    | 242                                                   | 0.026                                  |
| 40-44                   | 11.0                                                      | 3939                            | 145                                      | 1.10                                      | 62                                    | 340                                                   | 0.039                                  |
| 45-49                   | 11.4                                                      | 4374                            | 238                                      | 1.14                                      | 118                                   | 563                                                   | 0.058                                  |
| 50-54                   | 7.1                                                       | 4297                            | 359                                      | 0.71                                      | 110                                   | 451                                                   | 0.047                                  |
| 55-59                   | 5.8                                                       | 4187                            | 484                                      | 0.58                                      | 117                                   | 402                                                   | 0.044                                  |
| 60-64                   | 8.9                                                       | 3968                            | 664                                      | 0.89                                      | 234                                   | 644                                                   | 0.076                                  |
| 65-69                   | 9.2                                                       | 3838                            | 946                                      | 0.92                                      | 335                                   | 695                                                   | 0.090                                  |
| 70-74                   | 13.4                                                      | 3202                            | 1449                                     | 1.34                                      | 622                                   | 886                                                   | 0.153                                  |
| 75-79                   | 9.7                                                       | 2109                            | 2468                                     | 0.97                                      | 505                                   | 367                                                   | 0.128                                  |
| 80-84                   | 5.3                                                       | 1808                            | 4374                                     | 0.53                                      | 420                                   | 71                                                    | 0.075                                  |
| 85-89                   | 2.5                                                       | 1336                            | 8099                                     | 0.25                                      | 269                                   | 166                                                   | 0.032                                  |
| <b>Total or average</b> | <b>8.7</b>                                                | <b>49037</b>                    | <b>834</b>                               | <b>0.87</b>                               | <b>2875</b>                           | <b>5129</b>                                           | <b>0.802</b>                           |

90 <sup>1</sup>Based on reported trips of the day preceding participants' interviews for the *Enquête mobilité des*  
 91 *personnes (People's mobility survey)* [5]. Distances travelled were calculated based on reported  
 92 departures and arrival places, and converted into times considering an average speed of 14.9 km.h<sup>-1</sup>  
 93 [7].

94 <sup>2</sup>Retrieved from the National Institute of Statistics and Economic Studies (INSEE), 2007-2060  
 95 population projections.

96 <sup>3</sup>Assuming a 10% reduction in all-cause mortality for 100 minutes of cycling per week with a linear  
 97 dose-response function [8].

98 <sup>4</sup>Based on the standard value of a statistical life year of € 135,000 (in 2019€), as per national  
 99 recommendations for the socioeconomic evaluation of public investments (publicly available [here](#)).  
 100

100

101

## 102 Discussion

103 The French health benefits of cycling appear low when compared to those reported for the  
 104 Netherlands back in 2010-2013, where cycling contributed to a half-a-year-longer life expectancy and  
 105 annual monetary benefits of cycling reached €18.6 billion, for a population about 4 times smaller  
 106 than France [4]. However, it is worth highlighting that even if they appear moderate, the French  
 107 levels of cycling already provide substantial monetary benefits which would further increase with an  
 108 augmentation in bike practice. Hence, public investments in cycling-promotion policies, such as

109 improved cycling infrastructures and facilities, are likely to yield a high cost-benefit ratio in the  
110 medium term.

111 Despite repeated calls to decrease motorized trips for the interest of the climate and to increase  
112 active mobility for public health, the level of cycling for France did not evolve substantially between  
113 2008 and 2019. The modal share of cycling remained the same (2.7%) across both survey rounds [5].  
114 Therefore, we argue that public policies to promote cycling represent a missed opportunity for both  
115 climate targets and public health in France over the last decade.

116 Unfortunately, recent announces do not reveal a massive shift in mobility policies. As in many other  
117 European countries, the French government has recently cut taxes by 15 cents per liter of gasoline  
118 in response to the latest increase in fuel prices [10]. This policy will cost about €2 billion over 4  
119 months. In comparison, the 2018 French strategy to promote cycling, one of the most ambitious ever  
120 implemented in the country, relied on public investments of only €0.45 billion over 7 years [11].

121 We hope that the health and climate benefits of cycling will soon be recognized and that it will  
122 receive the attention and investments it deserves. Recently, due to the Covid-19 impact on public  
123 transportation, some local authorities have rapidly incentivized cycling by rolling out pop-up bike  
124 lanes. This resulted in a large short-term increase in cycling, including in France [12]. Commitment of  
125 national and local authorities is critical to sustaining these changes and the contribution of cycling to  
126 public and planetary health.

127

128

129

## 130 REFERENCES

- 131 1. ANSES. Avis relatif à l'évaluation des risques liés aux niveaux d'activité physique et de  
132 sédentarité de la population des adultes de 18 à 65 ans, hors femmes enceintes et  
133 ménopausées. (saisine 2017-SA-0064\_b). Maisons-Alfort, France: ANSES; 2022. Available:  
134 [https://www.anses.fr/fr/content/manque-d%E2%80%99activit%C3%A9-physique-et-](https://www.anses.fr/fr/content/manque-d%E2%80%99activit%C3%A9-physique-et-exc%C3%A8s-de-s%C3%A9dentarit%C3%A9-une-priorit%C3%A9-de-sant%C3%A9-publique)  
135 [exc%C3%A8s-de-s%C3%A9dentarit%C3%A9-une-priorit%C3%A9-de-sant%C3%A9-publique](https://www.anses.fr/fr/content/manque-d%E2%80%99activit%C3%A9-physique-et-exc%C3%A8s-de-s%C3%A9dentarit%C3%A9-une-priorit%C3%A9-de-sant%C3%A9-publique)
- 136 2. Brutel C, Pages J. La voiture reste majoritaire pour les déplacements domicile-travail, même  
137 pour de courtes distances. INSEE Première. 2021.
- 138 3. The High Council on Climate (HCC). Renforcer l'atténuation, engager l'adaptation [Reinforce  
139 mitigation, engage adaptation]. Paris, France; 2021. Available:  
140 [https://www.hautconseilclimat.fr/publications/rapport-annuel-2021-renforcer-lattenuation-](https://www.hautconseilclimat.fr/publications/rapport-annuel-2021-renforcer-lattenuation-engager-ladaptation/)  
141 [engager-ladaptation/](https://www.hautconseilclimat.fr/publications/rapport-annuel-2021-renforcer-lattenuation-engager-ladaptation/)
- 142 4. Fishman E, Schepers P, Kamphuis CBM. Dutch Cycling: Quantifying the Health and Related  
143 Economic Benefits. *Am J Public Health*. 2015;105: e13-15. doi:10.2105/AJPH.2015.302724

- 144 5. Service de la donnée et des études statistiques (SDES). Résultats détaillés de l'enquête mobilité  
145 des personnes 2019. In: Données et études statistiques pour le changement climatique,  
146 l'énergie, l'environnement, le logement, et les transports [Internet]. [cited 17 Mar 2022].  
147 Available: [https://www.statistiques.developpement-durable.gouv.fr/resultats-detailles-de-](https://www.statistiques.developpement-durable.gouv.fr/resultats-detailles-de-lenquete-mobilite-des-personnes-de-2019)  
148 [lenquete-mobilite-des-personnes-de-2019](https://www.statistiques.developpement-durable.gouv.fr/resultats-detailles-de-lenquete-mobilite-des-personnes-de-2019)
- 149 6. National Institute of Statistics and Economic Studies (INSEE). Projections de population 2007-  
150 2060 pour la France métropolitaine. Insee Résultats. 2010. Available:  
151 <https://www.insee.fr/fr/statistiques/1281151?sommaire=2020101>
- 152 7. Egiguren J, Nieuwenhuijsen MJ, Rojas-Rueda D. Premature Mortality of 2050 High Bike Use  
153 Scenarios in 17 Countries. *Environ Health Perspect*. 2021;129: 127002. doi:10.1289/EHP9073
- 154 8. Kelly P, Kahlmeier S, Götschi T, Orsini N, Richards J, Roberts N, et al. Systematic review and  
155 meta-analysis of reduction in all-cause mortality from walking and cycling and shape of dose  
156 response relationship. *Int J Behav Nutr Phys Act*. 2014;11: 132. doi:10.1186/s12966-014-0132-x
- 157 9. Quinet E. Cost benefit assessment of public investments. Final Report Summary and  
158 recommendations Paris, France: CGSP (Policy Planning Commission). 2013. Available:  
159 [https://www.strategie.gouv.fr/sites/strategie.gouv.fr/files/archives/CGSP\\_Evaluation\\_socioeco-](https://www.strategie.gouv.fr/sites/strategie.gouv.fr/files/archives/CGSP_Evaluation_socioeconomique_17092013.pdf)  
160 [nomique\\_17092013.pdf](https://www.strategie.gouv.fr/sites/strategie.gouv.fr/files/archives/CGSP_Evaluation_socioeconomique_17092013.pdf)
- 161 10. Le Monde. Carburants: une «remise à la pompe de 15 centimes par litre» dès le 1er avril  
162 pour enrayer la hausse des prix. *Le Monde.fr*. 12 Mar 2022. Available:  
163 [https://www.lemonde.fr/politique/article/2022/03/12/carburants-une-remise-a-la-pompe-de-](https://www.lemonde.fr/politique/article/2022/03/12/carburants-une-remise-a-la-pompe-de-15-centimes-par-litre-s-appliquera-a-partir-du-1er-avril-annonce-jean-castex_6117275_823448.html)  
164 [15-centimes-par-litre-s-appliquera-a-partir-du-1er-avril-annonce-jean-](https://www.lemonde.fr/politique/article/2022/03/12/carburants-une-remise-a-la-pompe-de-15-centimes-par-litre-s-appliquera-a-partir-du-1er-avril-annonce-jean-castex_6117275_823448.html)  
165 [castex\\_6117275\\_823448.html](https://www.lemonde.fr/politique/article/2022/03/12/carburants-une-remise-a-la-pompe-de-15-centimes-par-litre-s-appliquera-a-partir-du-1er-avril-annonce-jean-castex_6117275_823448.html). Accessed 17 Mar 2022.
- 166 11. L'État vous aide à adopter le vélo au quotidien. In: *Gouvernement.fr* [Internet]. [cited 17 Mar  
167 2022]. Available: [https://www.gouvernement.fr/les-actions-du-gouvernement/transition-](https://www.gouvernement.fr/les-actions-du-gouvernement/transition-ecologique/l-etat-vous-aide-a-adopter-le-velo-au-quotidien)  
168 [ecologique/l-etat-vous-aide-a-adopter-le-velo-au-quotidien](https://www.gouvernement.fr/les-actions-du-gouvernement/transition-ecologique/l-etat-vous-aide-a-adopter-le-velo-au-quotidien)
- 169 12. Kraus S, Koch N. Provisional COVID-19 infrastructure induces large, rapid increases in cycling.  
170 *Proc Natl Acad Sci U S A*. 2021;118: e2024399118. doi:10.1073/pnas.2024399118

171

172

173
